# Supplementary material for: Identifying and quantifying geogenic organic carbon in soils – the case of graphite
Source: Copernicus journal article supplement (doi:10.5194/soil-2019-30), 2019-06-20
Supplement: Supplementary file 1 [file soil-2019-30-supplement.pdf]

# **Supplementary to the paper: Identifying and quantifying geogenic organic carbon in soils – the case of graphite**

Jeroen H.T. Zethof<sup>1</sup>, Martin Leue<sup>2</sup>, Cordula Vogel<sup>1</sup>, Shane W. Stoner<sup>3</sup>, Karsten Kalbitz<sup>1</sup>

<sup>1</sup> Institute of Soil Science and Site Ecology, Technische Universität Dresden, 01737 Tharandt, Germany

5 <sup>2</sup> Leibniz-Centre for Agricultural Landscape Research (ZALF), Research Area 1 Landscape Functioning, Working Group  
Hydropedology, Eberswalder Str. 84, D-15374 Müncheberg, Germany

<sup>3</sup> Max-Planck Institute for Biogeochemistry, Hans-Knöll-Straße 10, 07745 Jena, Germany

Correspondence to: Jeroen Zethof ([jeroen.zethof@tu-dresden.de](mailto:jeroen.zethof@tu-dresden.de))

10

15

20

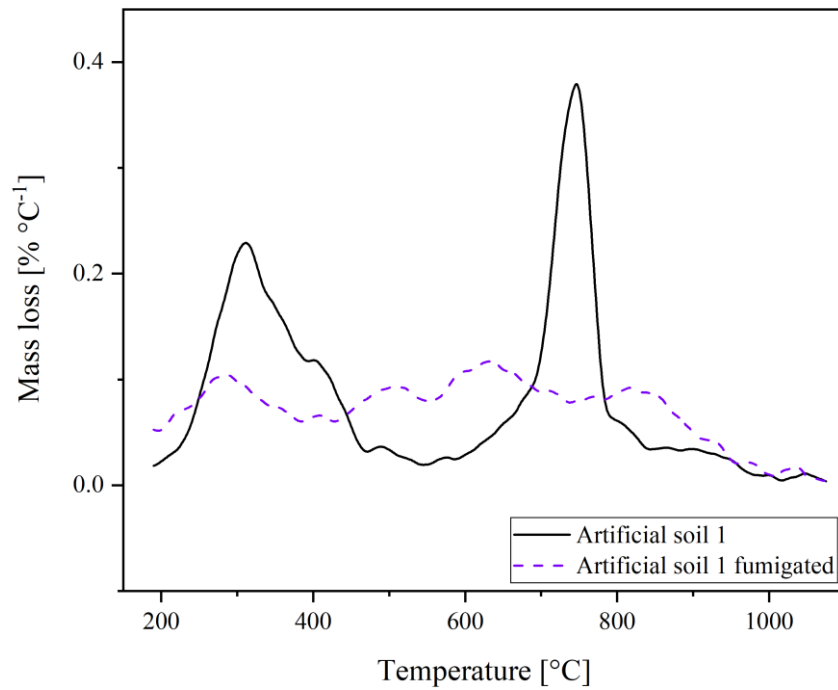

**Fig. S1: Thermogravimetric analysis of artificial soil 1 before and after acid fumigation with HCl, as described in section 2.3.**

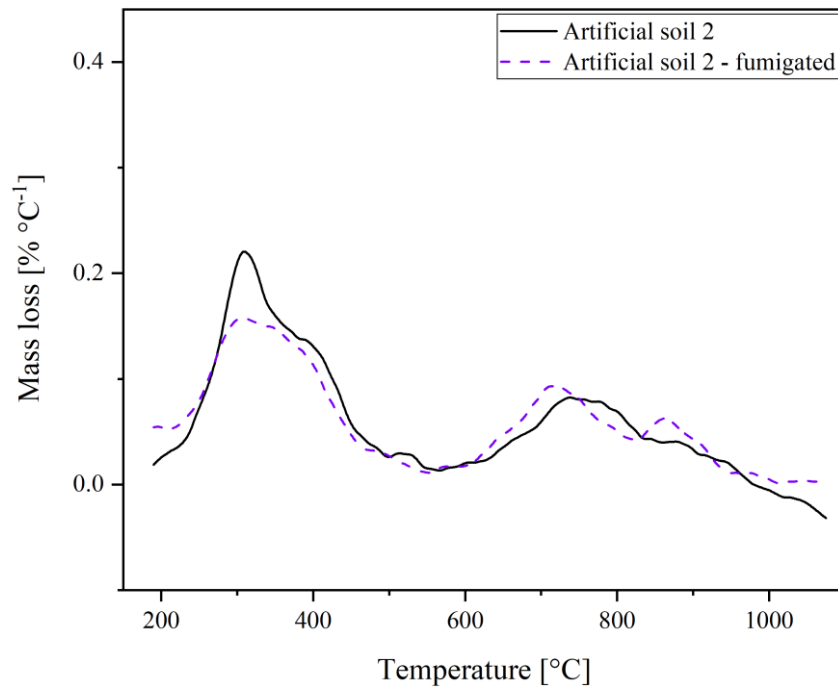

**Fig. S2: Thermogravimetric analysis of artificial soil 2, without carbonates, before and after acid fumigation with HCl, as described in section 2.3.**

5

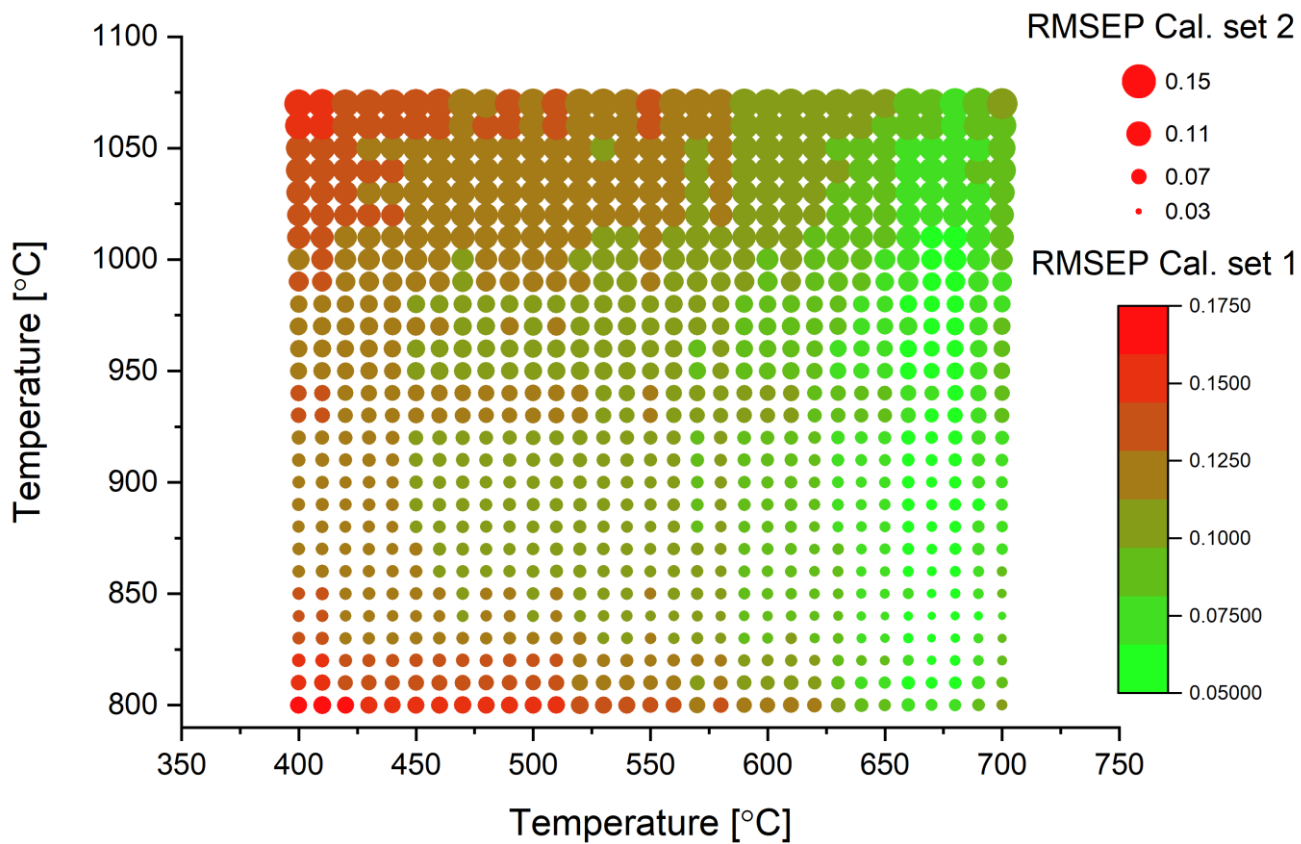

Fig. S3: Exploration of the best TGA temperature range (x – y axis) for creating a graphite content prediction model, based on the root-mean-square error (RMSE) data for calibration set 1 (color) and calibration set 2 (size). The smaller the RMSE, the better the model fitted to the data.

5

10

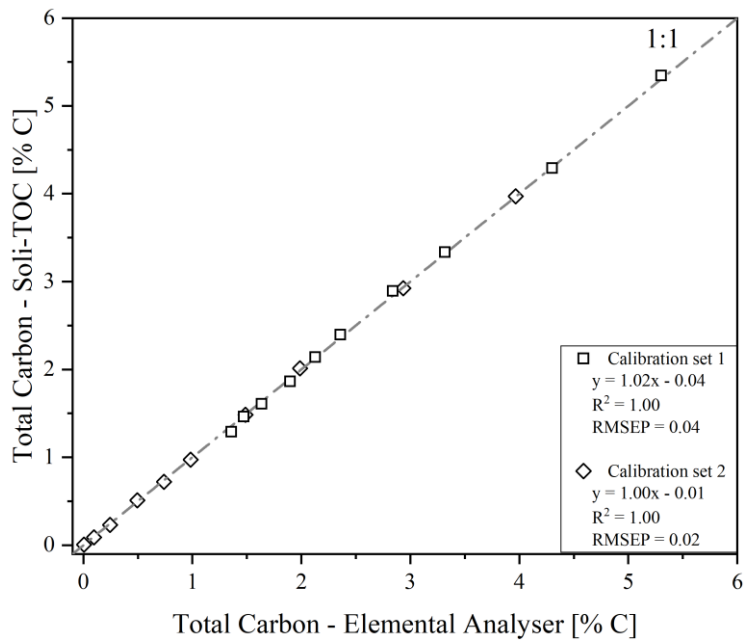

**Fig. S4: Total carbon of the two calibrations sets as measured by the Elemental analyser and Soli-TOC device.**
